# Supplementary material for: Synthesis and structure of [(Ph3P)2Cu(μ-SeCH2Ph)2In(SeCH2Ph)2] as a single-source precursor for the preparation of CuInSe2 nano-materials
Source: Royal Society of Chemistry journal article supplement (doi:10.1039/c9ra03429c), 2019-01-01
Supplement: c9ra03429c1.pdf [file c9ra03429c1.pdf]

## **Synthesis and Structure of [(Ph<sub>3</sub>P)<sub>2</sub>Cu( $\mu$ -SeCH<sub>2</sub>Ph)<sub>2</sub>In(SeCH<sub>2</sub>Ph)<sub>2</sub>] as Single-Source Precursor for the Preparation of CuInSe<sub>2</sub> Nanomaterials**

**Manoj K. Pal<sup>a</sup>, Sandip Dey<sup>a\*</sup>, Suman Neogy<sup>b</sup> and Mukesh Kumar<sup>c</sup>**

<sup>a</sup>Chemistry Division, <sup>b</sup>Mechanical Metallurgy Division, <sup>c</sup>Radiation Biology and Health Sciences Division, Bhabha Atomic Research Centre, Mumbai 400 085, India

\*E-mail: [dsandip@barc.gov.in](mailto:dsandip@barc.gov.in)

Intensity data for [(PPh<sub>3</sub>)<sub>2</sub>CuIn(SeCH<sub>2</sub>C<sub>6</sub>H<sub>5</sub>)<sub>4</sub>] was collected on a SuperNova CCD diffractometer. The crystals were kept at 293 ± 1 K during data collection. The structures were solved using Olex2 [1]. Refinement was done using structure solution program by Direct Method ShelXL [2] refinement package using Least Squares minimisation. The non-hydrogen atoms were refined anisotropically and fitted with hydrogen atoms in their calculated positions. The molecular structures were drawn using ORTEP. Crystallographic and structural determination data are given in Table 1.

1. O. V. Dolomanov, L. J. Bourhis, R. J. Gildea, J.A.K. Howard, H. Puschmann, *J. Appl. Crystallogr.*, 2009, **42**, 339-341.
2. SHELXS G. M. Sheldrick, *Acta Cryst.*, 2008, **A64**, 112-122.

**Table S1:** Crystallographic and structure refinement data for [(PPh<sub>3</sub>)<sub>2</sub>CuIn(SeCH<sub>2</sub>C<sub>6</sub>H<sub>5</sub>)<sub>4</sub>]:

| Compounds                                      | [(PPh <sub>3</sub> ) <sub>2</sub> CuIn(SeCH <sub>2</sub> C <sub>6</sub> H <sub>5</sub> ) <sub>4</sub> ] |
|------------------------------------------------|---------------------------------------------------------------------------------------------------------|
| Chemical Formula                               | C <sub>64</sub> H <sub>58</sub> CuInP <sub>2</sub> Se <sub>4</sub>                                      |
| Formula weight                                 | 1383.24                                                                                                 |
| Crystal Size (mm <sup>3</sup> )                | 0.275 × 0.148 × 0.108                                                                                   |
| Diffractometer                                 | SuperNova CCD                                                                                           |
| T/K                                            | 293                                                                                                     |
| λ/Å                                            | CuKα (λ = 1.54184)                                                                                      |
| Crystal system                                 | Monoclinic                                                                                              |
| Space group                                    | C2/c                                                                                                    |
| a/Å                                            | 22.6988(9)                                                                                              |
| b/Å                                            | 13.1304(4)                                                                                              |
| c/Å                                            | 21.1832(10)                                                                                             |
| α/°                                            | 90                                                                                                      |
| β/°                                            | 110.171(5)                                                                                              |
| γ/°                                            | 90                                                                                                      |
| V/Å <sup>3</sup>                               | 5926.3(4)                                                                                               |
| ρ <sub>calc</sub> /g cm <sup>-3</sup>          | 1.550                                                                                                   |
| Z                                              | 4                                                                                                       |
| μ/mm <sup>-1</sup>                             | 7.156                                                                                                   |
| Reflection collected                           | 5251                                                                                                    |
| Data/restraints/parameters                     | 5291/0/296                                                                                              |
| Final R <sub>1</sub> , wR <sub>2</sub> indices | R <sub>1</sub> = 0.0684, wR <sub>2</sub> = 0.1727                                                       |
| R <sub>1</sub> , wR <sub>2</sub> (all data)    | R <sub>1</sub> = 0.1175, wR <sub>2</sub> = 0.2523                                                       |
| Largest diff. peak & hole [eÅ <sup>-3</sup> ]  | 1.02 and -1.25                                                                                          |

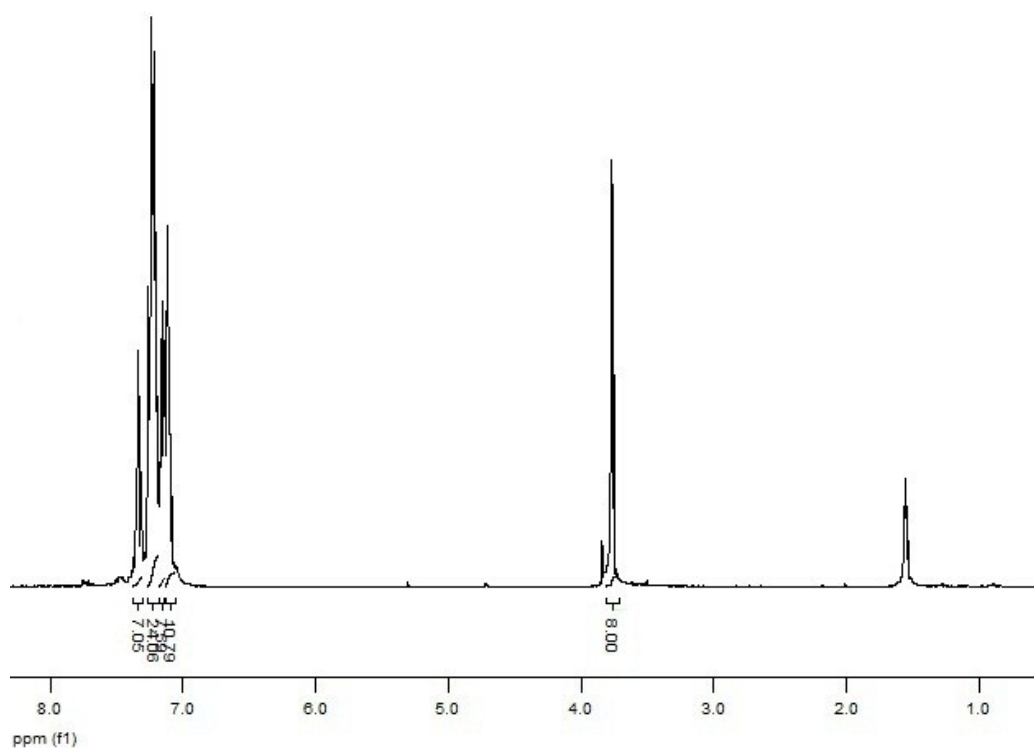

**Figure S1:**  $^1\text{H}$  NMR spectra (500 MHz,  $\text{CDCl}_3$ ) of  $[(\text{PPh}_3)_2\text{CuIn}(\text{SeCH}_2\text{C}_6\text{H}_5)_4]$ .

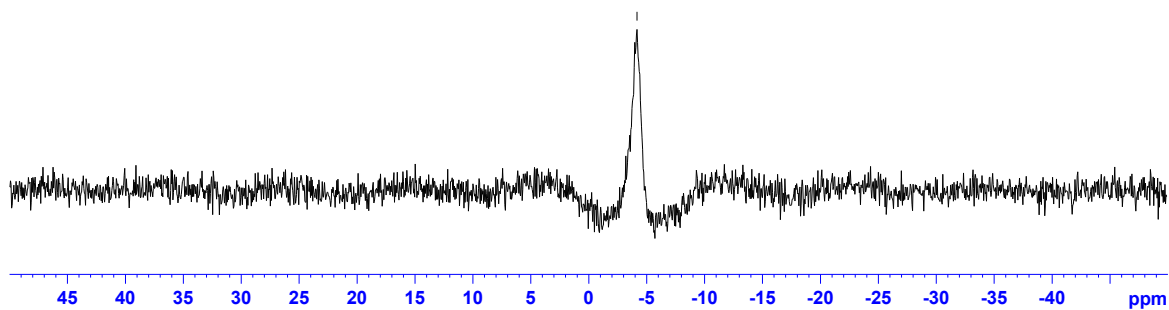

**Figure S2:**  $^{31}\text{P}\{^1\text{H}\}$  NMR spectra (242 MHz,  $\text{CDCl}_3$ ) of  $[(\text{PPh}_3)_2\text{CuIn}(\text{SeCH}_2\text{C}_6\text{H}_5)_4]$ .

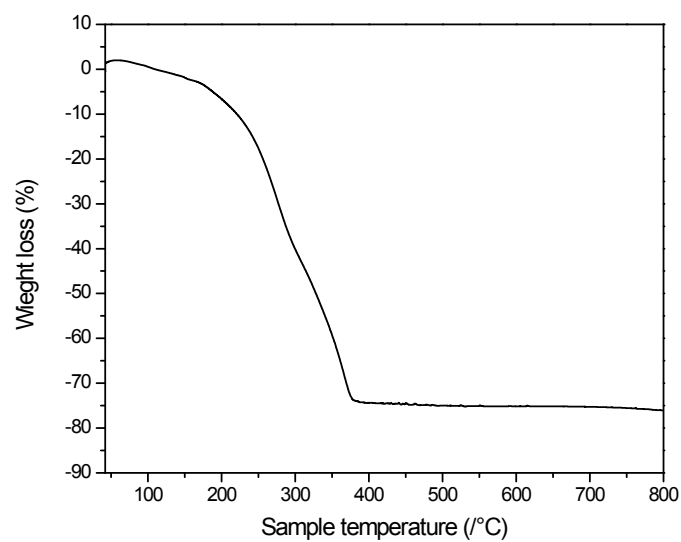

**Figure S3:** TG curve for  $[(PPh_3)_2CuIn(SeCH_2C_6H_5)_4]$

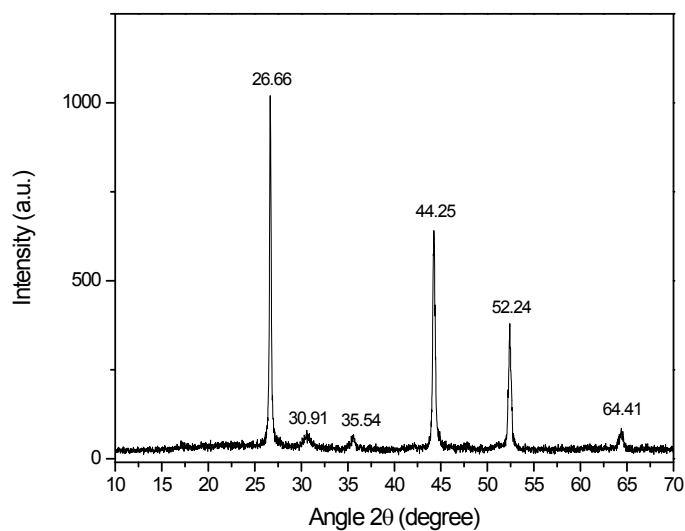

**Figure S4:** Powder XRD of  $CuInSe_2$  obtained from  $[(PPh_3)_2CuIn(SeCH_2C_6H_5)_4]$  on thermolysis in a furnace at 400 °C for 2h in argon atmosphere.

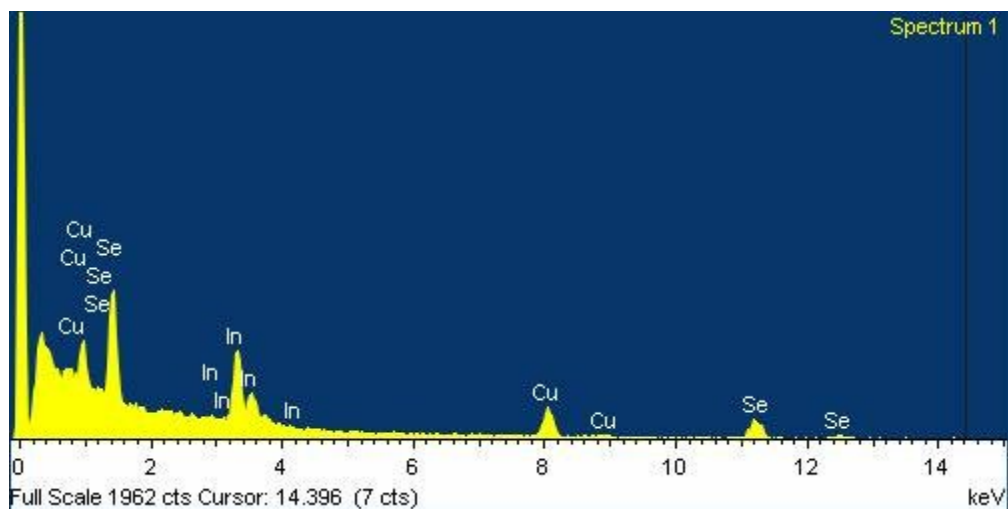

**Figure S5:** EDX spectrum of  $\text{CuInSe}_2$  obtained from furnace heating of  $[(\text{PPh}_3)_2\text{CuIn}(\text{SeCH}_2\text{C}_6\text{H}_5)_4]$  at  $400\text{ }^\circ\text{C}$  for 2h.

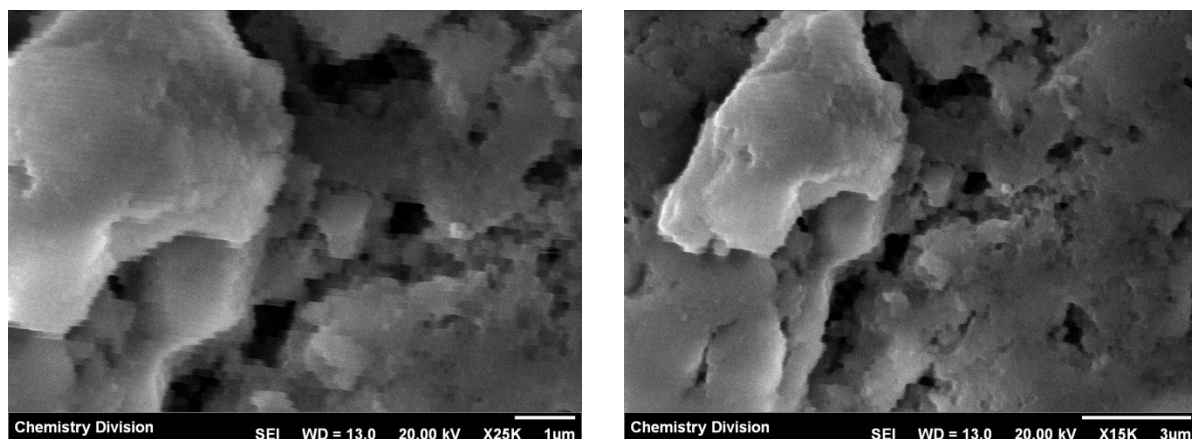

**Figure S6:** SEM images with different magnifications of  $\text{CuInSe}_2$  obtained from furnace heating of  $[(\text{PPh}_3)_2\text{CuIn}(\text{SeCH}_2\text{C}_6\text{H}_5)_4]$  at  $400\text{ }^\circ\text{C}$  for 2h.

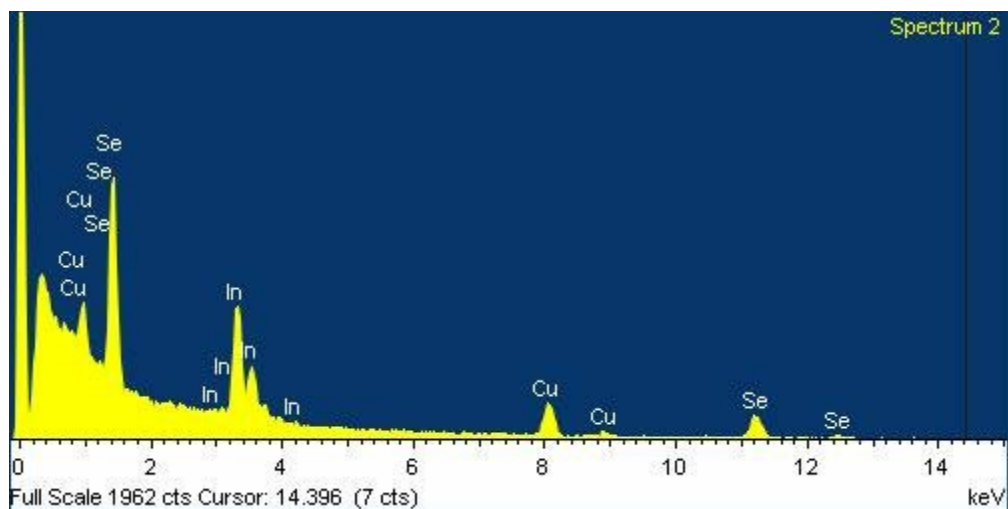

**Figure S7:** EDX spectrum of  $\text{CuInSe}_2$  obtained from  $[(\text{PPh}_3)_2\text{CuIn}(\text{SeCH}_2\text{C}_6\text{H}_5)_4]$  at  $300\text{ }^\circ\text{C}$  in OA for 30 min.

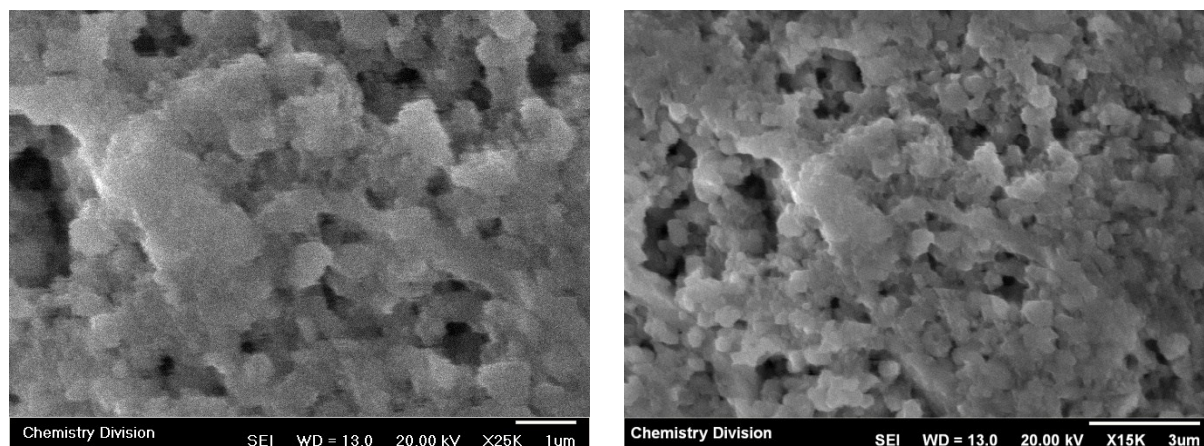

**Figure S8:** SEM images with different magnifications of  $\text{CuInSe}_2$  obtained from  $[(\text{PPh}_3)_2\text{CuIn}(\text{SeCH}_2\text{C}_6\text{H}_5)_4]$  at  $300\text{ }^\circ\text{C}$  in OA for 30 min.

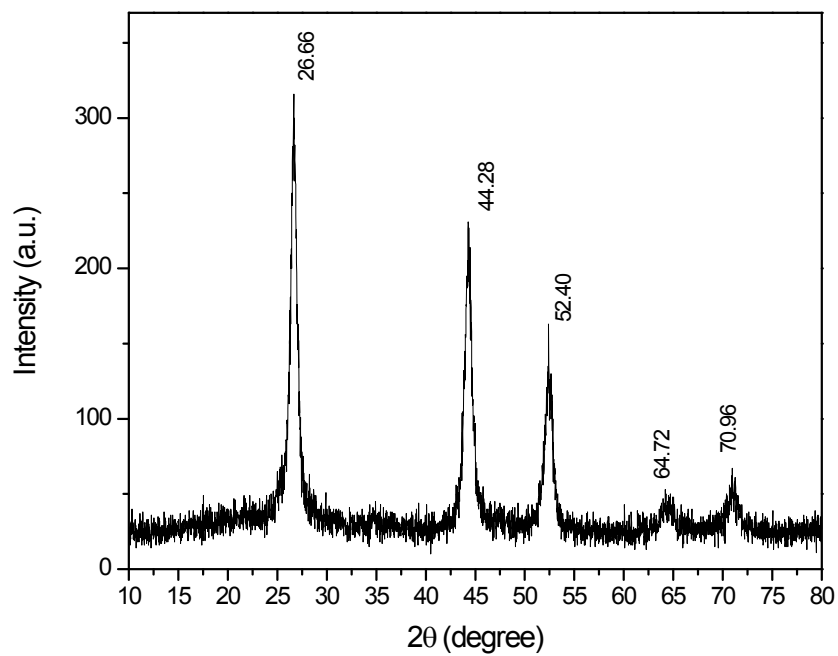

**Figure S9:** The PXRD pattern of  $\text{CuInSe}_2$  obtained from thermolysis of  $[(\text{PPh}_3)_2\text{CuIn}(\text{SeCH}_2\text{C}_6\text{H}_5)_4]$  in hexadecylamine at 300 °C for 30 min.

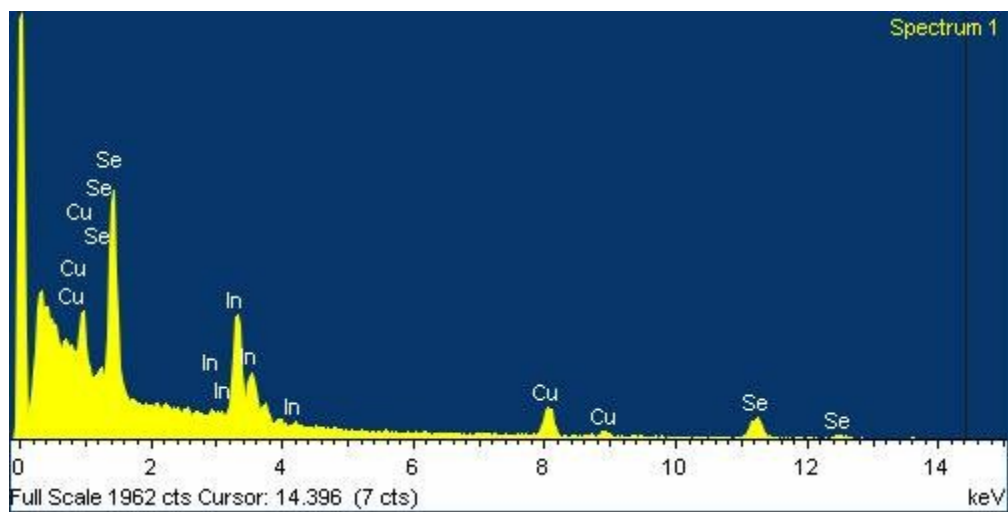

**Figure S10:** EDX spectrum of  $\text{CuInSe}_2$  obtained from  $[(\text{PPh}_3)_2\text{CuIn}(\text{SeCH}_2\text{C}_6\text{H}_5)_4]$  at  $300\text{ }^\circ\text{C}$  in HDA for 30 min.

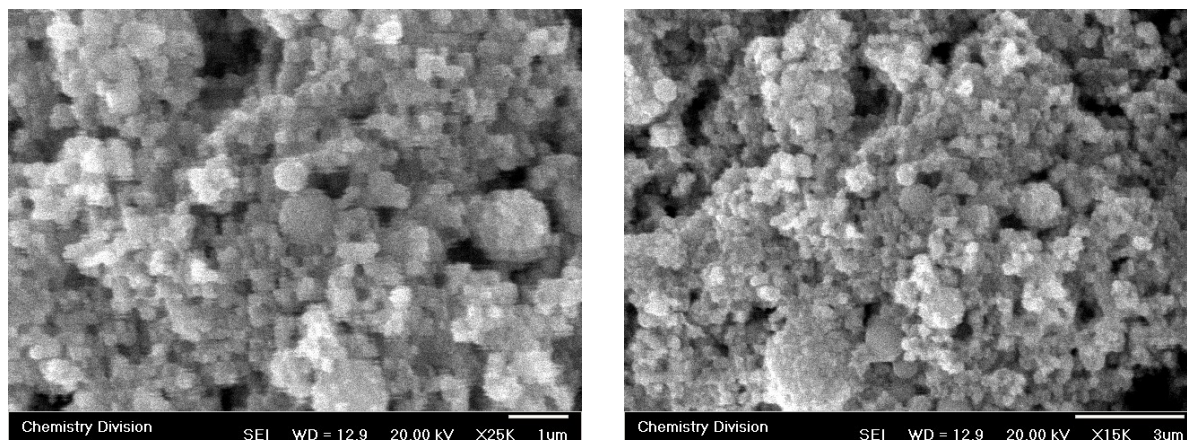

**Figure S11:** SEM images with different magnifications of  $\text{CuInSe}_2$  obtained from  $[(\text{PPh}_3)_2\text{CuIn}(\text{SeCH}_2\text{C}_6\text{H}_5)_4]$  at  $300\text{ }^\circ\text{C}$  in HDA for 30 min.



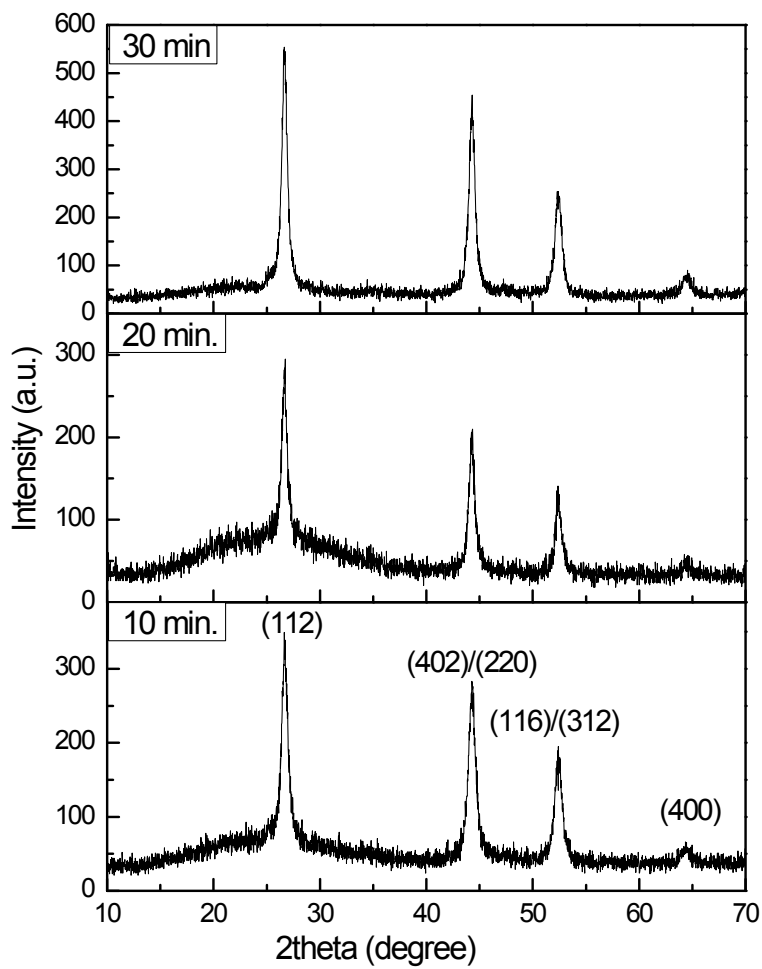

**Figure S12:** The PXRD pattern of CuInSe<sub>2</sub> obtained from thermolysis of [(PPh<sub>3</sub>)<sub>2</sub>CuIn(SeCH<sub>2</sub>C<sub>6</sub>H<sub>5</sub>)<sub>4</sub>] in OA at 300 °C for 10, 20 and 30 min.

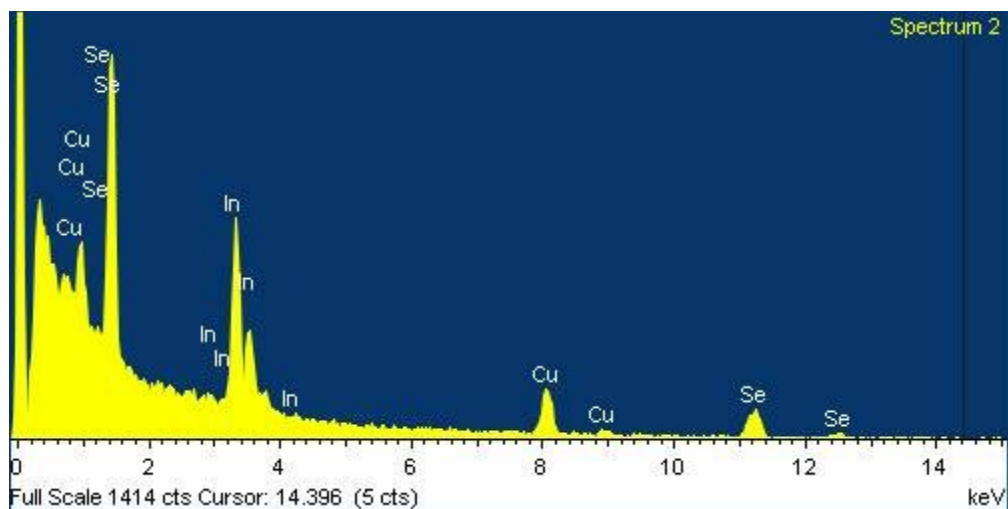

**Figure S13:** EDX spectrum of  $\text{CuInSe}_2$  obtained from  $[(\text{PPh}_3)_2\text{CuIn}(\text{SeCH}_2\text{C}_6\text{H}_5)_4]$  at  $300\text{ }^\circ\text{C}$  in OA for 10 min.

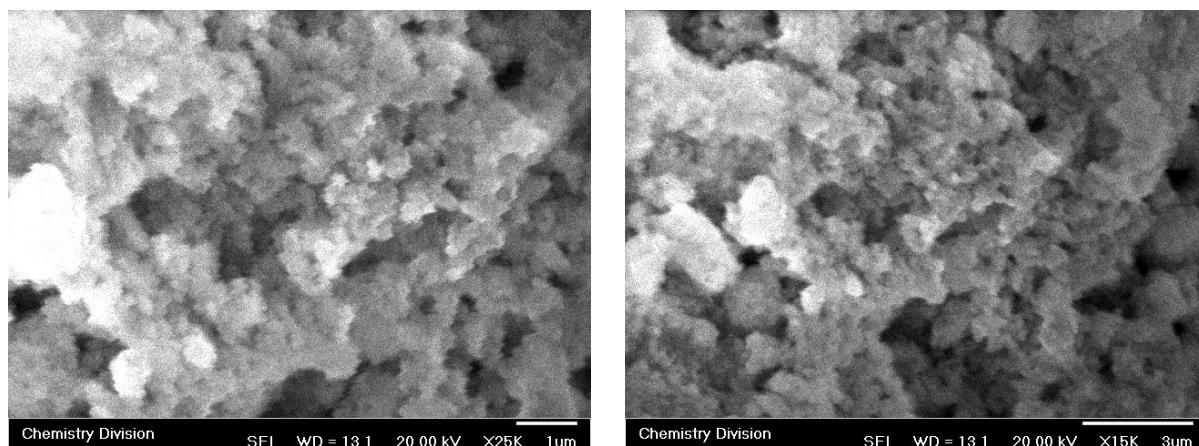

**Figure S14:** SEM images with different magnifications of  $\text{CuInSe}_2$  obtained from  $[(\text{PPh}_3)_2\text{CuIn}(\text{SeCH}_2\text{C}_6\text{H}_5)_4]$  at  $300\text{ }^\circ\text{C}$  in OA for 10 min.

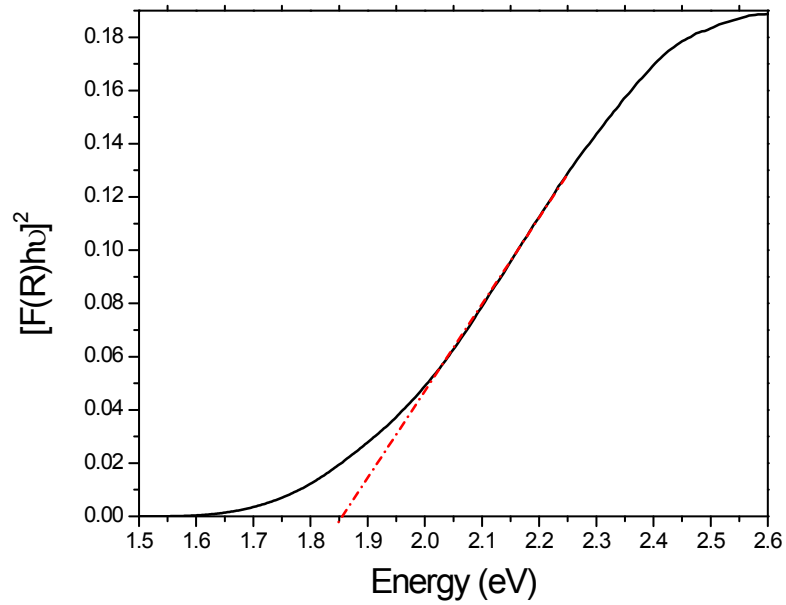

**Figure S15:** Plots of  $[F(R)hv]^2$  vs energy generated by Kubelka-Munk transformation of solid-state diffuse reflectance data  $\text{CuInSe}_2$  nanostructures obtained by thermolysis of  $[(\text{PPh}_3)_2\text{CuIn}(\text{SeCH}_2\text{C}_6\text{H}_5)_4]$  in HDA at  $300\text{ }^\circ\text{C}$  for a duration of 30 minutes.
